# Supplementary material for: Commercial articulated collaborative in situ 3D bioprinter for skin wound healing
Source: PubMed Central journal article supplement — Int J Bioprint. 2023 Jan 31;9(2):675. doi: 10.18063/ijb.v9i2.675 (PMC10090815; doi:10.18063/ijb.v9i2.675), 2023-01-31
Supplement: IJB-9-2-675-s001.pdf [file IJB-9-2-675-s001.pdf]

RESEARCH ARTICLE

# Commercial articulated collaborative *in situ* 3D bioprinter for skin wound healing

## Supplementary File

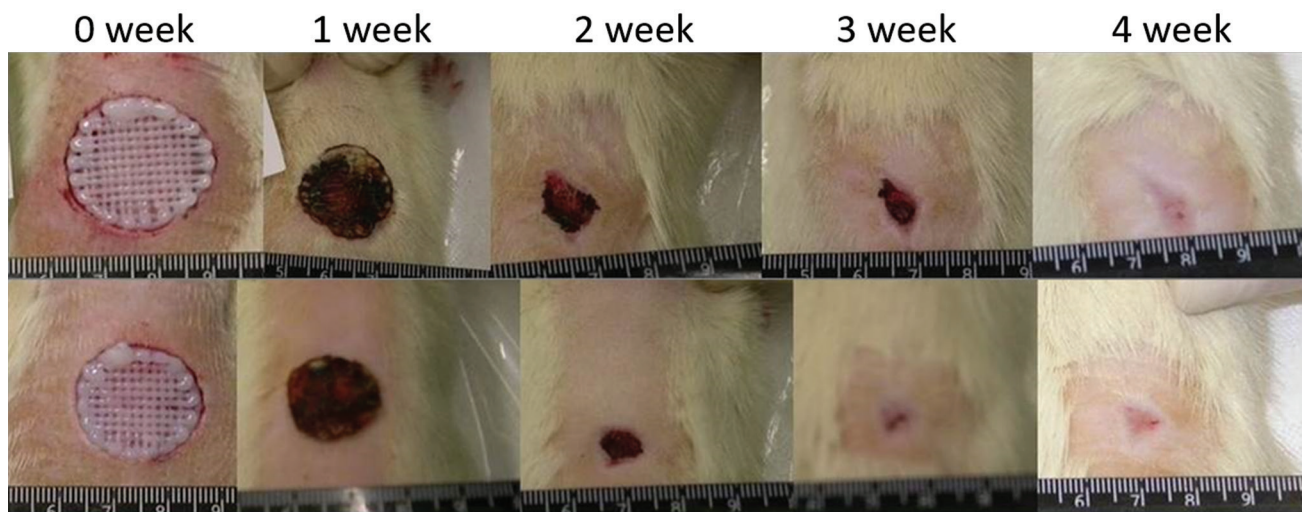

Figure S1. Macroscopic analysis of wound healing dynamics.
